# Supplementary material for: Fluid extraction from the left-right organizer uncovers mechanical properties needed for symmetry breaking
Source: eLife. 2023 Jul 21;12:e83861. doi: 10.7554/eLife.83861 (PMC10361723; doi:10.7554/eLife.83861)
Supplement: Figure 1—figure supplement 1—source data 1. [file elife-83861-fig1-figsupp1-data1.xlsx]

## Sheet: Sheet 1 - Figure1_Supplement1_d
Figure1_Supplement1_data
Cilia number
embryo	WT	Manip_5ss
1	53	52
2	51	39
3	37	42
4	64	43
5	44	48
6	72	49
7	43	57
8	44	68
9	46	71
