# Supplementary material for: Fluid extraction from the left-right organizer uncovers mechanical properties needed for symmetry breaking
Source: eLife. 2023 Jul 21;12:e83861. doi: 10.7554/eLife.83861 (PMC10361723; doi:10.7554/eLife.83861)
Supplement: Figure 1—figure supplement 2—source data 1. [file elife-83861-fig1-figsupp2-data1.xlsx]

## Sheet: CBF
	CBF (Hz)
embryo	Sham	Manipulated
1	40.18	38.6
2	35.36	38.59
3	40.72	36.67
4	42.43	40.46
5	37.75	33.75

## Sheet: C and D
	Cilia count per region (Anterior vs Posterior) and per motility status (Mot vs Im)
embryo	anterior Mot_Sham	anterior Mot_NoDefects	Anterior Imot_Sham	Anterior Imot_NoDefects	Posterior M_Sham	Posterior M_NoDefects	Posterior Im_Sham	Posterior Im_NoDefects
1	32	22	2	3	18	16	2	8
2	20	11	7	7	15	10	8	6
3	11	19	4	2	10	12	5	4
4	18	29	1	3	11	24	0	5
5	17	32	3	3	12	24	2	2
6	30	11	1	13	16	8	7	7
7	14	NA	7	NA	14	NA	3	NA
