# Supplementary material for: Fluid extraction from the left-right organizer uncovers mechanical properties needed for symmetry breaking
Source: eLife. 2023 Jul 21;12:e83861. doi: 10.7554/eLife.83861 (PMC10361723; doi:10.7554/eLife.83861)
Supplement: Figure 1—figure supplement 3—source data 1. [file elife-83861-fig1-figsupp3-data1.xlsx]

## Sheet: Sheet1
KV area (µm^2)
Sham_6ss	Sham_7ss	Sham_8ss	No defects_6ss	No defects_7ss	No defects_8ss	Defects_6ss	Defects_7ss	Defects_8ss
2358.7	2889.7	3145.3	1367.5	2457.2	2760.7	920.8	1200.7	1595.3
1872.1	2765.4	3305.3	1303.2	1752.6	1954.7	1334	2170.2	2741.1
2197	2644.2	2959.3	1265.2	1978.7	2584.2	1576.8	2088.6	2657.1
1686.9	2082	2246.9	1541.4	2093.9	3009.1	862.9	1443.6	2125.4
2068.4	2773.1	3454.8	1077.3	2331.7	1782	1798.1	2409.2	2848.3
1816.5	2487.4	2886.1	1031.7	1366.1	2495.6		946	1358
			725	1869.8	1513.9	1271.2	2540.8	3081.4
			827.7	1287.7	1769.5
			1680.5	2241.4	2545
