# Supplementary material for: Fluid extraction from the left-right organizer uncovers mechanical properties needed for symmetry breaking
Source: eLife. 2023 Jul 21;12:e83861. doi: 10.7554/eLife.83861 (PMC10361723; doi:10.7554/eLife.83861)
Supplement: Figure 1—source data 1. [file elife-83861-fig1-data1.xlsx]

## Sheet: Fig1.b
	Situs Solitus	Situs Inversus	Heterotaxia
WT (n=1223)	1137	37	49
3ss (n=13)	11	0	2
4ss (n=26)	19	2	5
5ss (n=40)	26	5	9
6ss (n=27)	23	1	3
7ss (n=25)	22	1	2
8ss (n=20)	19	0	1
9-12ss (n=22)	22	0	0

## Sheet: Fig1.c
	Left	Right	Bilateral
WT (n=26)	0	26	0
Single intervention (n=17)	0	11	6
	Left	Right	Bilateral
WT (n=21)	0	21	0
Single intervention (n=16)	1	9	6
