# Supplementary material for: Fluid extraction from the left-right organizer uncovers mechanical properties needed for symmetry breaking
Source: eLife. 2023 Jul 21;12:e83861. doi: 10.7554/eLife.83861 (PMC10361723; doi:10.7554/eLife.83861)
Supplement: Figure 4—source data 1. [file elife-83861-fig4-data1.xlsx]

## Sheet: Folha1
CBF (Hz)
Sham	MC dilution
40.18	27.6
35.36	34.24
40.72	30.71
42.43	28.54
37.75	34.76
