# Supplementary material for: Fluid extraction from the left-right organizer uncovers mechanical properties needed for symmetry breaking
Source: eLife. 2023 Jul 21;12:e83861. doi: 10.7554/eLife.83861 (PMC10361723; doi:10.7554/eLife.83861)
Supplement: Figure 5—source data 1. [file elife-83861-fig5-data1.xlsx]

## Sheet: Fig5A
	dand5 situs
	Left	Right	Bilateral
WT (n=24)	0	22	2
DB dilution (n=6)	0	5	1
MC dilution (n=12)	1	4	7

## Sheet: Fig5B
	Heart situs
	Left	Central	Right
WT (n=487)	452	8	27
DB dilution (n=15)	14	1	0
MC dilution (n=16)	7	3	6
