# Supplementary material for: Fluid extraction from the left-right organizer uncovers mechanical properties needed for symmetry breaking
Source: eLife. 2023 Jul 21;12:e83861. doi: 10.7554/eLife.83861 (PMC10361723; doi:10.7554/eLife.83861)
Supplement: Figure 7—source data 1. [file elife-83861-fig7-data1.xlsx]

## Sheet: overall
3 ss				5 ss				6 ss				7 ss				8 ss
	N transcripts				N transcripts				N transcripts				N transcripts				N transcripts
Embryo	N spot L	N spot R	total	Embryo	N spot L	N spot R	total	Embryo	N spot L	N spot R	total	Embryo	N spot L	N spot R	total	Embryo	N spot L	N spot R	total
Experiment-2746-Airyscan Processing-01-1_croprotated	14591	14184	28775	Experiment-2715-Airyscan Processing-03	23154	28788	51942	Experiment-137-Airyscan Processing-01	21869	27587	49456	Experiment-01-Airyscan Processing-01_filter 8.6	19887	28567	48454	Experiment-2117-Airyscan Processing-01	23673	39302	62975
Experiment-2747-Airyscan Processing-02	16769	17412	34181	Experiment-2716-Airyscan Processing-04_	23477	23081	46558	Experiment-138-Airyscan Processing-02	11022	15632	26654	Experiment-2827-Airyscan Processing-02_filter9_2	16054	21121	37175	Experiment-2713-Airyscan Processing-01	23366	28361	51727
Experiment-2748-Airyscan Processing-03-2	18872	21763	40635	Experiment-2783-Airyscan Processing-04	16422	19881	36303	Experiment-140-Airyscan Processing-01	11204	14015	25219	Experiment-2847-Airyscan Processing-02_filter8.2	21254	29660	50914	Experiment-2719-Airyscan Processing-02	17616	24973	42589
Experiment-367-Airyscan Processing-05	7697	9786	17483	Bro1-Airyscan Processing-01 filter9	17191	20495	37686	Experiment-369-Airyscan Processing-07	12154	16659	28813	Experiment-2848-Airyscan Processing-03_filter8.4	17807	22351	40158	Experiment-2848-Airyscan Processing-03	11869	18691	30560
Experiment-362-Airyscan Processing-01	13346	14509	27855					Experiment-368-Airyscan Processing-06	13334	16671	30005	Experiment-01--03	16392	24881	41273
Experiment-363-Airyscan Processing-02	15830	17286	33116
Experiment-364-Airyscan Processing-03	10625	8574	19199
Experiment-366-Airyscan Processing-04	11875	10847	22722

## Sheet: anterior
3 ss				5 ss				6 ss				7 ss				8 ss
	N transcripts				N transcripts				N transcripts				N transcripts				N transcripts
Embryo	N spot L	N spot R	total	Embryo	N spot L	N spot R	total	Embryo	N spot L	N spot R	total	Embryo	N spot L	N spot R	total	Embryo	N spot L	N spot R	total
Experiment-2746-Airyscan Processing-01-1_croprotated	8269	5542	13811	Experiment-2715-Airyscan Processing-03	15183	17792	32975	Experiment-137-Airyscan Processing-01	10081	11810	21891	Experiment-01-Airyscan Processing-01_filter 8.6	7717	13513	21230	Experiment-2117-Airyscan Processing-01	10668	20878	31546
Experiment-2747-Airyscan Processing-02	10047	8245	18292	Experiment-2716-Airyscan Processing-04_	10703	13435	24138	Experiment-138-Airyscan Processing-02	3198	6092	9290	Experiment-2827-Airyscan Processing-02_filter9_2	15355	16105	31460	Experiment-2713-Airyscan Processing-01	6696	12438	19134
Experiment-2748-Airyscan Processing-03-2	7919	11071	18990	Experiment-2783-Airyscan Processing-04	9438	9508	18946	Experiment-140-Airyscan Processing-01	7059	6989	14048	Experiment-2847-Airyscan Processing-02_filter8.2	8991	19524	28515	Experiment-2719-Airyscan Processing-02	5390	11615	17005
Experiment-367-Airyscan Processing-05	4341	5151	9492	Bro1-Airyscan Processing-01 filter9	6437	10335	16772	Experiment-369-Airyscan Processing-07	5849	7404	13253	Experiment-2848-Airyscan Processing-03_filter8.4	6705	8588	15293	Experiment-2848-Airyscan Processing-03	4769	8230	12999
Experiment-362-Airyscan Processing-01	7120	8770	15890					Experiment-368-Airyscan Processing-06	5421	9120	14541	Experiment-01--03	7770	11109	18879
Experiment-363-Airyscan Processing-02	7416	6276	13692
Experiment-364-Airyscan Processing-03	5313	4116	9429
Experiment-366-Airyscan Processing-04	5926	4609	10535

## Sheet: posterior
3 ss				5 ss				6 ss				7 ss				8 ss
	N transcripts				N transcripts				N transcripts				N transcripts				N transcripts
Embryo	N spot L	N spot R	total	Embryo	N spot L	N spot R	total	Embryo	N spot L	N spot R	total	Embryo	N spot L	N spot R	total	Embryo	N spot L	N spot R	total
Experiment-2746-Airyscan Processing-01-1_croprotated	6426	8752	15178	Experiment-2715-Airyscan Processing-03	8089	11120	19209	Experiment-137-Airyscan Processing-01	11845	15900	27745	Experiment-01-Airyscan Processing-01_filter 8.6	12213	15161	27374	Experiment-2117-Airyscan Processing-01	13035	18578	31613
Experiment-2747-Airyscan Processing-02	7908	10346	18254	Experiment-2716-Airyscan Processing-04_	12915	9816	22731	Experiment-138-Airyscan Processing-02	7900	9639	17539	Experiment-2827-Airyscan Processing-02_filter9_2	729	5135	5864	Experiment-2713-Airyscan Processing-01	16756	11954	28710
Experiment-2748-Airyscan Processing-03-2	11033	10692	21725	Experiment-2783-Airyscan Processing-04	7424	10419	17843	Experiment-140-Airyscan Processing-01	4187	7103	11290	Experiment-2847-Airyscan Processing-02_filter8.2	12395	10259	22654	Experiment-2719-Airyscan Processing-02	12289	13544	25833
Experiment-367-Airyscan Processing-05	3401	4635	8036	Bro1-Airyscan Processing-01 filter9	10842	10284	21126	Experiment-369-Airyscan Processing-07	5319	9287	14606	Experiment-2848-Airyscan Processing-03_filter8.4	11217	13890	25107	Experiment-2848-Airyscan Processing-03	7384	10528	17912
Experiment-362-Airyscan Processing-01	6319	5803	12122					Experiment-368-Airyscan Processing-06	7957	7621	15578	Experiment-01--03	8542	13912	22454
Experiment-363-Airyscan Processing-02	8448	10604	19052
Experiment-364-Airyscan Processing-03	5372	4505	9877
Experiment-366-Airyscan Processing-04	6002	6346	12348
